# Supplementary material
Source: MDPI journal article supplement (https://www.mdpi.com/2071-1050/14/21/14230)
Supplement: s1 [file s1]

**Supplementary material to the paper Drissen, T. et al. National Park or Cultural Landscape Preservation? What the Soil Seed Bank reveals for Plant Diversity Conservation**

**Table S1.** Vascular plant species recorded in the standing vegetation (VE) and the soil seed bank (SB). Given is the percentage frequency per vegetation unit (for abbreviations see Table 2). Number of plots in brackets. Species not documented for Asinara Island before in bold. Nomenclature: Conti et al. [1], except for *Olea europaea* var. *europaea* and var. *sylvestris*, which follow Pignatti [2].

| Vegetation unit<br>Number of plots                                | COA  |    | GRA  |    | TWG |     | CIS |    | EUP  |    | JUN |    | PIN |    | QUE |     | OLI |    |
|-------------------------------------------------------------------|------|----|------|----|-----|-----|-----|----|------|----|-----|----|-----|----|-----|-----|-----|----|
|                                                                   | [11] |    | [10] |    | [6] |     | [6] |    | [10] |    | [6] |    | [3] |    | [3] |     | [2] |    |
|                                                                   | VE   | SB | VE   | SB | VE  | SB  | VE  | SB | VE   | SB | VE  | SB | VE  | SB | VE  | SB  | VE  | SB |
| <i>Agrostis pourretii</i> Willd.                                  | .    | .  | .    | .  | 50  | 50  | 17  | 33 | .    | .  | .   | .  | .   | .  | .   | .   | .   | .  |
| <i>Agrostis stolonifera</i> L.                                    | .    | .  | .    | .  | 17  | 17  | .   | .  | .    | .  | .   | .  | .   | .  | .   | .   | .   | .  |
| <i>Aira caryophyllea</i> L. subsp. <i>caryophyllea</i>            | .    | .  | 10   | 10 | .   | .   | 17  | .  | 10   | .  | .   | .  | .   | .  | .   | .   | .   | .  |
| <i>Aira elegantissima</i> Schur                                   | .    | .  | .    | .  | 17  | .   | 17  | 17 | .    | 10 | .   | .  | .   | .  | .   | .   | .   | .  |
| <i>Allium ampeloprasum</i> L.                                     | .    | .  | .    | .  | .   | .   | .   | .  | .    | .  | .   | .  | .   | .  | 33  | .   | .   | .  |
| <i>Allium parviflorum</i> Viv.                                    | 9    | .  | .    | .  | .   | .   | .   | .  | .    | .  | .   | .  | .   | .  | .   | .   | .   | .  |
| <i>Allium roseum</i> L.                                           | 9    | 9  | 10   | 10 | .   | .   | .   | 17 | .    | .  | .   | .  | .   | .  | .   | .   | .   | .  |
| <i>Allium subhirsutum</i> L.                                      | .    | .  | .    | .  | .   | .   | 17  | 17 | 50   | .  | 33  | .  | 33  | .  | 33  | .   | .   | .  |
| <i>Allium triquetrum</i> L.                                       | .    | .  | .    | .  | .   | .   | .   | .  | 20   | 10 | .   | .  | 67  | .  | 67  | .   | 50  | .  |
| <i>Alopecurus bulbosus</i> Gouan                                  | .    | .  | .    | .  | 17  | .   | .   | .  | .    | .  | .   | .  | .   | .  | .   | .   | .   | .  |
| <i>Althaea hirsuta</i> L.                                         | .    | .  | .    | .  | .   | .   | .   | .  | 10   | .  | .   | .  | .   | .  | .   | .   | 50  | .  |
| <i>Ammi majus</i> L.                                              | .    | .  | 10   | .  | .   | .   | .   | .  | 10   | .  | .   | .  | .   | .  | .   | .   | .   | .  |
| <i>Anacyclus clavatus</i> (Desf.) Pers.                           | .    | .  | 40   | .  | 17  | .   | .   | .  | .    | .  | 17  | .  | .   | .  | .   | .   | .   | .  |
| <i>Anagallis arvensis</i> L. subsp. <i>latifolia</i> (L.) Arcang. | 91   | 82 | 100  | 90 | 100 | 100 | 100 | 67 | 100  | 90 | 83  | 83 | 67  | 33 | 33  | 67  | 100 | 50 |
| <i>Anagallis foemina</i> Mill.                                    | 9    | .  | .    | .  | .   | .   | .   | .  | .    | .  | .   | .  | .   | .  | .   | .   | .   | .  |
| <i>Andryala integrifolia</i> L.                                   | 64   | 36 | 10   | 10 | .   | .   | 83  | 50 | 90   | 60 | 17  | .  | 67  | 33 | 33  | .   | .   | .  |
| <i>Anemone hortensis</i> L. subsp. <i>hortensis</i>               | 9    | .  | .    | .  | .   | .   | 17  | .  | .    | .  | 17  | .  | 100 | .  | 33  | .   | .   | .  |
| <i>Anogramma leptophylla</i> (L.) Link                            | .    | .  | .    | .  | .   | .   | .   | .  | 40   | 10 | .   | .  | 67  | 33 | 100 | 100 | .   | .  |

| Vegetation unit<br>Number of plots                                      | COA  |    | GRA  |    | TWG |    | CIS |     | EUP  |    | JUN |    | PIN |    | QUE |    | OLI |    |
|-------------------------------------------------------------------------|------|----|------|----|-----|----|-----|-----|------|----|-----|----|-----|----|-----|----|-----|----|
|                                                                         | [11] |    | [10] |    | [6] |    | [6] |     | [10] |    | [6] |    | [3] |    | [3] |    | [2] |    |
|                                                                         | VE   | SB | VE   | SB | VE  | SB | VE  | SB  | VE   | SB | VE  | SB | VE  | SB | VE  | SB | VE  | SB |
| <i>Anthemis arvensis</i> L. subsp. <i>arvensis</i>                      | 9    | 18 | 60   | 90 | .   | 83 | 33  | 67  | 10   | 40 | 17  | 17 | .   | .  | .   | .  | 50  | 50 |
| <i>Anthemis arvensis</i> L. subsp. <i>incrassata</i><br>(Loisel.) Nyman | 45   | .  | 10   | .  | 17  | .  | 17  | .   | 20   | .  | 33  | .  | .   | .  | .   | .  | .   | .  |
| <i>Anthoxanthum aristatum</i> Boiss. subsp.<br><i>aristatum</i>         | 64   | 27 | 30   | 10 | 50  | 33 | 100 | 100 | 70   | 50 | 50  | 33 | .   | .  | .   | .  | 50  | 50 |
| <i>Apium nodiflorum</i> (L.) Lag. subsp.<br><i>nodiflorum</i>           | .    | .  | .    | .  | .   | .  | .   | .   | .    | 10 | .   | .  | .   | .  | .   | .  | .   | .  |
| <b><i>Arabidopsis thaliana</i> (L.) Heynh.</b>                          | .    | .  | .    | .  | .   | .  | .   | .   | .    | 10 | .   | .  | .   | .  | .   | .  | .   | .  |
| <i>Arenaria leptoclados</i> (Rchb.) Guss.                               | .    | .  | .    | .  | .   | .  | .   | .   | .    | .  | .   | 17 | .   | .  | .   | .  | .   | .  |
| <i>Arisarum vulgare</i> Targ. Tozz.                                     | 91   | .  | 30   | .  | 17  | .  | 100 | 33  | 100  | .  | 83  | 17 | 100 | .  | 100 | .  | 100 | 50 |
| <i>Asparagus acutifolius</i> L.                                         | .    | .  | .    | .  | .   | .  | 33  | .   | 30   | .  | .   | .  | .   | .  | .   | .  | 50  | .  |
| <i>Asparagus albus</i> L.                                               | .    | .  | .    | .  | .   | .  | 17  | .   | 30   | .  | 17  | .  | .   | .  | .   | .  | 50  | .  |
| <i>Asphodelus ramosus</i> L. subsp. <i>ramosus</i>                      | 18   | .  | 10   | .  | .   | .  | 100 | .   | 80   | .  | 50  | .  | .   | .  | .   | .  | 50  | .  |
| <i>Asplenium obovatum</i> Viv. subsp. <i>obovatum</i>                   | .    | .  | .    | .  | .   | .  | .   | .   | 10   | .  | .   | .  | .   | .  | 67  | 33 | .   | .  |
| <i>Asplenium onopteris</i> L.                                           | .    | .  | .    | .  | .   | .  | .   | .   | 10   | .  | .   | .  | .   | .  | 100 | .  | .   | .  |
| <i>Asterolinon linum-stellatum</i> (L.) Duby                            | 27   | 9  | .    | .  | .   | .  | 100 | 67  | .    | .  | 17  | .  | .   | .  | .   | .  | .   | .  |
| <i>Astragalus hamosus</i> L.                                            | .    | .  | 10   | 10 | 17  | .  | .   | .   | .    | .  | .   | .  | .   | .  | .   | .  | .   | .  |
| <i>Astragalus pelecinus</i> (L.) Barneby subsp.<br><i>pelecinus</i>     | .    | .  | 50   | 30 | 17  | .  | .   | .   | .    | 10 | .   | .  | .   | .  | .   | .  | .   | .  |
| <i>Attractylis gummifera</i> L.                                         | .    | .  | 20   | .  | .   | .  | 17  | .   | .    | .  | .   | .  | .   | .  | .   | .  | .   | .  |
| <i>Atriplex portulacoides</i> L.                                        | 9    | .  | .    | .  | .   | .  | .   | .   | .    | .  | 17  | .  | .   | .  | .   | .  | .   | .  |
| <i>Avena barbata</i> Pott ex Link                                       | 100  | .  | 70   | 10 | 50  | .  | 100 | .   | 100  | .  | 67  | .  | .   | .  | .   | .  | 50  | .  |
| <i>Bartsia trixago</i> L.                                               | 9    | .  | 10   | .  | .   | .  | 17  | .   | .    | .  | .   | .  | .   | .  | .   | .  | .   | .  |
| <i>Bellium bellidioides</i> L.                                          | 45   | 45 | .    | .  | .   | .  | .   | .   | .    | .  | 17  | 17 | .   | .  | .   | .  | .   | .  |

| Vegetation unit<br>Number of plots                                                               | COA  |    | GRA  |    | TWG |    | CIS |    | EUP  |    | JUN |    | PIN |     | QUE |    | OLI |    |
|--------------------------------------------------------------------------------------------------|------|----|------|----|-----|----|-----|----|------|----|-----|----|-----|-----|-----|----|-----|----|
|                                                                                                  | [11] |    | [10] |    | [6] |    | [6] |    | [10] |    | [6] |    | [3] |     | [3] |    | [2] |    |
|                                                                                                  | VE   | SB | VE   | SB | VE  | SB | VE  | SB | VE   | SB | VE  | SB | VE  | SB  | VE  | SB | VE  | SB |
| <i>Beta vulgaris</i> L. subsp. <i>vulgaris</i>                                                   | .    | .  | .    | .  | .   | 17 | .   | .  | .    | .  | .   | .  | .   | .   | .   | .  | .   | .  |
| <i>Blackstonia perfoliata</i> (L.) Huds. subsp. <i>imperfoliata</i> (L.f.) Franco & Rocha Afonso | .    | .  | .    | .  | .   | .  | .   | .  | .    | .  | 17  | 17 | .   | .   | .   | .  | .   | .  |
| <i>Bolboschoenus maritimus</i> (L.) Palla                                                        | .    | .  | .    | .  | .   | .  | .   | .  | .    | .  | .   | .  | .   | .   | .   | .  | .   | 50 |
| <i>Borago officinalis</i> L.                                                                     | .    | .  | .    | .  | .   | .  | .   | .  | 20   | .  | .   | .  | .   | .   | .   | .  | .   | .  |
| <i>Brachypodium retusum</i> (Pers.) P. Beauv.                                                    | 64   | .  | 10   | .  | .   | 17 | 67  | .  | 40   | .  | 33  | .  | .   | .   | .   | .  | .   | .  |
| <i>Brassica nigra</i> (L.) W.D.J. Koch                                                           | .    | .  | .    | .  | .   | .  | .   | .  | .    | .  | 17  | .  | .   | .   | .   | .  | 50  | .  |
| <i>Briza maxima</i> L.                                                                           | 73   | .  | 20   | .  | 33  | .  | 100 | .  | 90   | .  | 50  | .  | 100 | .   | .   | .  | 50  | .  |
| <i>Briza minor</i> L.                                                                            | .    | .  | .    | .  | 50  | .  | 33  | .  | .    | .  | .   | .  | 33  | .   | .   | .  | .   | .  |
| <i>Bromus diandrus</i> Roth subsp. <i>maximus</i> (Desf.) Soó                                    | 45   | .  | .    | .  | 17  | .  | 17  | .  | 40   | 10 | 67  | .  | 67  | .   | .   | .  | 50  | .  |
| <i>Bromus hordeaceus</i> L. subsp. <i>hordeaceus</i>                                             | 73   | .  | 90   | 30 | 100 | 67 | 33  | .  | 40   | 10 | 50  | .  | .   | .   | .   | .  | .   | 50 |
| <i>Bromus madritensis</i> L.                                                                     | 64   | .  | 40   | .  | 17  | .  | 50  | .  | 80   | .  | 50  | .  | 67  | .   | .   | .  | 50  | .  |
| <i>Bromus rubens</i> L.                                                                          | 18   | .  | 10   | .  | .   | .  | 50  | .  | 20   | .  | .   | .  | .   | .   | .   | .  | .   | .  |
| <i>Bryonia marmorata</i> Petit                                                                   | .    | .  | .    | .  | .   | .  | 17  | .  | .    | .  | .   | .  | 33  | .   | .   | .  | 50  | .  |
| <i>Bunias erucago</i> L.                                                                         | .    | .  | 10   | .  | .   | .  | .   | .  | .    | .  | 17  | .  | .   | .   | .   | .  | .   | .  |
| <i>Bupleurum semicompositum</i> L.                                                               | 45   | 45 | .    | .  | .   | .  | .   | .  | 10   | .  | 83  | 50 | .   | .   | .   | .  | .   | .  |
| <i>Calendula arvensis</i> L.                                                                     | 18   | .  | 90   | 40 | .   | 17 | 50  | 17 | 40   | 10 | 17  | .  | .   | .   | .   | .  | 50  | .  |
| <i>Calicotome spinosa</i> (L.) Link                                                              | 9    | .  | .    | .  | .   | .  | 17  | .  | .    | .  | .   | .  | .   | .   | .   | .  | .   | .  |
| <i>Calicotome villosa</i> (Poir.) Link                                                           | 9    | 9  | .    | .  | .   | .  | 33  | .  | 70   | .  | 33  | .  | 67  | .   | 33  | .  | 50  | .  |
| <i>Camphorosma monspeliaca</i> L.                                                                | 64   | .  | 10   | .  | .   | .  | .   | .  | .    | .  | 17  | .  | .   | .   | .   | .  | .   | .  |
| <i>Capsella rubella</i> Reut.                                                                    | .    | .  | 10   | 10 | .   | .  | .   | .  | 10   | .  | .   | .  | .   | .   | .   | .  | 50  | .  |
| <i>Cardamine hirsuta</i> L.                                                                      | .    | .  | .    | .  | .   | .  | 17  | 50 | 40   | 60 | .   | 17 | 100 | 100 | 100 | 67 | 50  | .  |

| Vegetation unit<br>Number of plots                                      | COA  |    | GRA  |    | TWG |    | CIS |    | EUP  |    | JUN |    | PIN |     | QUE |    | OLI |    |
|-------------------------------------------------------------------------|------|----|------|----|-----|----|-----|----|------|----|-----|----|-----|-----|-----|----|-----|----|
|                                                                         | [11] |    | [10] |    | [6] |    | [6] |    | [10] |    | [6] |    | [3] |     | [3] |    | [2] |    |
|                                                                         | VE   | SB | VE   | SB | VE  | SB | VE  | SB | VE   | SB | VE  | SB | VE  | SB  | VE  | SB | VE  | SB |
| <i>Carduus pycnocephalus</i> L. subsp. <i>pycnocephalus</i>             | .    | .  | 30   | .  | .   | .  | .   | .  | .    | .  | 17  | .  | 67  | .   | 33  | .  | 100 | .  |
| <i>Carex distachya</i> Desf.                                            | .    | .  | .    | .  | .   | 17 | .   | .  | .    | .  | .   | .  | .   | .   | 33  | .  | .   | .  |
| <i>Carex divisa</i> Huds.                                               | .    | .  | .    | .  | 67  | .  | .   | .  | .    | .  | .   | .  | .   | .   | .   | .  | .   | .  |
| <i>Carex divulsa</i> Stokes                                             | .    | .  | .    | .  | .   | .  | .   | .  | .    | .  | .   | .  | .   | .   | 67  | .  | .   | .  |
| <i>Carex flacca</i> Schreb. s.l.                                        | .    | .  | .    | .  | 17  | .  | .   | .  | .    | .  | .   | .  | .   | .   | .   | .  | .   | .  |
| <i>Carex vulpina</i> L.                                                 | .    | .  | .    | .  | 17  | .  | .   | .  | .    | .  | .   | .  | .   | .   | .   | .  | .   | .  |
| <i>Carlina corymbosa</i> L.                                             | 91   | .  | 90   | .  | .   | .  | 50  | .  | 30   | .  | 17  | .  | .   | .   | .   | .  | .   | .  |
| <i>Carlina lanata</i> L.                                                | 9    | .  | 30   | .  | 17  | .  | 67  | .  | 30   | .  | .   | .  | .   | .   | 33  | .  | .   | .  |
| <i>Carthamus lanatus</i> L. subsp. <i>lanatus</i>                       | .    | .  | 30   | 30 | 17  | 17 | .   | .  | .    | .  | .   | .  | .   | .   | .   | .  | .   | .  |
| <i>Castellia tuberculosa</i> (Moris) Bor                                | .    | .  | .    | .  | .   | .  | .   | .  | 10   | 10 | .   | .  | .   | .   | .   | .  | .   | .  |
| <i>Catapodium balearicum</i> (Willk.) H. Scholz                         | 73   | 36 | 20   | 20 | .   | .  | 33  | 17 | 10   | .  | 50  | 17 | .   | .   | .   | .  | .   | .  |
| <i>Catapodium rigidum</i> (L.) C.E. Hubb. ex Dony subsp. <i>rigidum</i> | .    | .  | 20   | 10 | .   | .  | 50  | .  | 20   | .  | 17  | .  | 100 | 67  | 100 | 67 | .   | .  |
| <i>Centaurea calcitrapa</i> L.                                          | .    | .  | 20   | 10 | .   | .  | 17  | .  | .    | .  | .   | .  | .   | .   | .   | .  | .   | .  |
| <i>Centaurea horrida</i> Badarò                                         | 55   | 9  | .    | .  | .   | .  | .   | .  | .    | .  | .   | .  | .   | .   | .   | .  | .   | .  |
| <i>Centaureum erythraea</i> Rafn subsp. <i>erythraea</i>                | 27   | 36 | 10   | .  | 50  | 17 | 17  | .  | .    | .  | .   | 33 | .   | 33  | .   | .  | .   | .  |
| <i>Centaureum maritimum</i> (L.) Fritsch                                | 45   | 55 | 10   | 20 | 67  | 50 | 50  | 67 | 20   | 30 | 33  | 33 | .   | 100 | .   | .  | .   | .  |
| <i>Centaureum pulchellum</i> (Sw.) Druce subsp. <i>pulchellum</i>       | .    | .  | .    | .  | .   | .  | .   | .  | .    | .  | 33  | .  | .   | .   | .   | .  | .   | .  |
| <i>Centaureum tenuiflorum</i> (Hoffmanns. & Link) Fritsch s.l.          | .    | 18 | .    | .  | .   | 67 | .   | .  | .    | .  | .   | 17 | .   | .   | .   | .  | .   | .  |
| <i>Centranthus calcitrapae</i> (L.) Dufr. subsp. <i>calcitrapae</i>     | 27   | .  | 10   | .  | .   | .  | 67  | 17 | 90   | 30 | 67  | 17 | 100 | 33  | 33  | .  | 50  | .  |

| Vegetation unit<br>Number of plots                  | COA  |    | GRA  |    | TWG |     | CIS |     | EUP  |    | JUN |    | PIN |     | QUE |    | OLI |    |
|-----------------------------------------------------|------|----|------|----|-----|-----|-----|-----|------|----|-----|----|-----|-----|-----|----|-----|----|
|                                                     | [11] |    | [10] |    | [6] |     | [6] |     | [10] |    | [6] |    | [3] |     | [3] |    | [2] |    |
|                                                     | VE   | SB | VE   | SB | VE  | SB  | VE  | SB  | VE   | SB | VE  | SB | VE  | SB  | VE  | SB | VE  | SB |
| <i>Cerastium glomeratum</i> Thuill.                 | 27   | 9  | 90   | 70 | 50  | 83  | 50  | 50  | 60   | 80 | 33  | 33 | 67  | 100 | .   | 33 | .   | 50 |
| <i>Cerastium semidecandrum</i> L.                   | .    | .  | 10   | 10 | .   | .   | .   | .   | .    | .  | .   | .  | .   | .   | .   | .  | .   | .  |
| <i>Chamaemelum fuscatum</i> (Brot.) Vasc.           | 55   | 9  | 10   | 40 | 100 | 100 | 17  | 33  | 30   | 10 | 17  | .  | .   | .   | .   | .  | .   | .  |
| <i>Charybdis maritima</i> (L.) Speta                | .    | .  | .    | .  | 17  | .   | .   | .   | .    | .  | .   | .  | .   | .   | 33  | .  | .   | .  |
| <i>Charybdis undulata</i> (Desf.) Speta             | .    | .  | .    | .  | .   | .   | 17  | .   | .    | .  | .   | .  | .   | .   | .   | .  | .   | .  |
| <i>Chenopodium album</i> L. s.l.                    | .    | .  | .    | .  | .   | .   | .   | .   | 10   | .  | .   | 33 | .   | .   | .   | .  | .   | .  |
| <i>Chenopodium murale</i> L.                        | .    | 9  | 20   | 20 | .   | 33  | .   | .   | 20   | 10 | 100 | 50 | .   | .   | .   | .  | .   | 50 |
| <i>Chenopodium urbicum</i> L.                       | .    | .  | .    | .  | 17  | .   | .   | .   | .    | .  | .   | .  | .   | .   | .   | .  | .   | .  |
| <i>Cichorium intybus</i> L. s.l.                    | .    | .  | 30   | .  | .   | .   | .   | .   | 10   | .  | .   | .  | .   | .   | .   | .  | .   | .  |
| <i>Cistus monspeliensis</i> L.                      | 9    | 9  | .    | .  | .   | .   | 100 | 100 | 70   | 90 | 17  | .  | .   | 33  | .   | 67 | .   | 50 |
| <i>Clematis cirrhosa</i> L.                         | .    | .  | .    | .  | .   | .   | .   | .   | 20   | .  | .   | .  | .   | .   | .   | .  | 100 | .  |
| <i>Colchicum neapolitanum</i> (Ten.) Ten.           | 9    | .  | .    | .  | .   | .   | .   | .   | .    | .  | .   | .  | .   | .   | .   | .  | .   | .  |
| <i>Coleostephus myconis</i> (L.) Cass. ex Rchb. f.  | .    | .  | 30   | 20 | 33  | .   | .   | .   | .    | .  | .   | .  | .   | .   | .   | .  | .   | .  |
| <i>Convolvulus althaeoides</i> L.                   | .    | .  | .    | .  | .   | .   | 17  | .   | .    | .  | .   | .  | .   | .   | .   | .  | .   | .  |
| <i>Convolvulus arvensis</i> L.                      | .    | .  | 60   | .  | 17  | .   | .   | .   | .    | .  | .   | .  | .   | .   | .   | .  | .   | .  |
| <i>Convolvulus siculus</i> L. s.l.                  | .    | .  | .    | .  | .   | .   | 17  | .   | 40   | .  | 17  | .  | .   | .   | .   | .  | .   | .  |
| <i>Crepis bellidifolia</i> Loisel.                  | 82   | 27 | .    | 10 | .   | .   | 17  | .   | .    | .  | 67  | .  | .   | .   | .   | .  | .   | .  |
| <i>Crepis biennis</i> L.                            | 45   | .  | 30   | .  | 17  | .   | .   | .   | 10   | .  | 33  | .  | .   | .   | .   | .  | .   | .  |
| <i>Crepis foetida</i> L.                            | 27   | .  | 30   | .  | .   | .   | 33  | 17  | 30   | .  | 67  | .  | .   | .   | .   | .  | 50  | .  |
| <i>Crepis leontodontoides</i> All.                  | 27   | .  | 30   | .  | .   | .   | 17  | .   | .    | .  | 50  | 33 | .   | .   | .   | .  | .   | .  |
| <i>Crithmum maritimum</i> L.                        | .    | .  | .    | .  | .   | .   | .   | .   | .    | .  | 17  | .  | .   | .   | .   | .  | .   | .  |
| <i>Cuscuta planiflora</i> Ten.                      | 36   | .  | .    | .  | .   | .   | 17  | .   | 20   | .  | 17  | .  | .   | .   | .   | .  | .   | .  |
| <i>Cyclamen repandum</i> Sm. subsp. <i>repandum</i> | .    | .  | .    | .  | .   | .   | .   | .   | .    | .  | .   | .  | .   | .   | 100 | .  | .   | .  |
| <i>Cynodon dactylon</i> (L.) Pers.                  | 27   | 9  | 40   | .  | .   | .   | .   | .   | .    | .  | 17  | .  | .   | .   | .   | .  | .   | .  |

[illegible]

| Vegetation unit<br>Number of plots                               | COA  |    | GRA  |    | TWG |    | CIS |     | EUP  |    | JUN |    | PIN |    | QUE |    | OLI |     |
|------------------------------------------------------------------|------|----|------|----|-----|----|-----|-----|------|----|-----|----|-----|----|-----|----|-----|-----|
|                                                                  | [11] |    | [10] |    | [6] |    | [6] |     | [10] |    | [6] |    | [3] |    | [3] |    | [2] |     |
|                                                                  | VE   | SB | VE   | SB | VE  | SB | VE  | SB  | VE   | SB | VE  | SB | VE  | SB | VE  | SB | VE  | SB  |
| <i>Eryngium campestre</i> L.                                     | .    | .  | 10   | .  | .   | .  | .   | .   | .    | .  | .   | .  | .   | .  | .   | .  | .   | .   |
| <i>Eryngium maritimum</i> L.                                     | 9    | .  | 20   | .  | .   | .  | .   | .   | .    | .  | .   | .  | .   | .  | .   | .  | .   | .   |
| <i>Euphorbia characias</i> L.                                    | 9    | .  | .    | .  | .   | .  | .   | .   | 10   | .  | .   | .  | .   | .  | .   | .  | .   | .   |
| <i>Euphorbia dendroides</i> L.                                   | .    | .  | .    | .  | 17  | .  | 33  | .   | 90   | 10 | 50  | .  | .   | .  | .   | .  | 50  | .   |
| <i>Euphorbia exigua</i> L. subsp. <i>exigua</i>                  | .    | .  | 10   | .  | .   | .  | 17  | 17  | .    | .  | 17  | 17 | .   | .  | .   | .  | .   | .   |
| <i>Euphorbia helioscopia</i> L. subsp. <i>helioscopia</i>        | .    | .  | 50   | 10 | 33  | .  | .   | .   | 20   | .  | .   | .  | .   | .  | .   | .  | .   | .   |
| <i>Euphorbia peplus</i> L.                                       | 45   | 36 | 30   | 30 | .   | .  | 67  | 100 | 90   | 60 | 83  | 83 | 33  | 33 | .   | .  | .   | 50  |
| <i>Euphorbia pithyusa</i> L. subsp. <i>pithyusa</i>              | 91   | 45 | 20   | 10 | 17  | .  | .   | .   | .    | .  | 17  | .  | .   | .  | .   | .  | .   | .   |
| <i>Euphorbia pterococca</i> Brot.                                | .    | .  | .    | .  | .   | .  | .   | .   | 20   | .  | 17  | 17 | .   | .  | 33  | .  | .   | .   |
| <i>Ferula communis</i> L.                                        | 36   | .  | .    | .  | .   | .  | 67  | .   | 80   | .  | 50  | .  | .   | .  | 33  | .  | 100 | .   |
| <i>Ficus carica</i> L.                                           | .    | .  | .    | .  | .   | .  | .   | .   | .    | .  | .   | .  | .   | 33 | .   | .  | .   | .   |
| <i>Filago gallica</i> L.                                         | 100  | 64 | 20   | 20 | .   | .  | 100 | 67  | 10   | 10 | 33  | 33 | .   | .  | .   | .  | .   | .   |
| <i>Filago pygmaea</i> L.                                         | 36   | .  | 30   | .  | .   | .  | .   | .   | 10   | .  | 17  | .  | .   | .  | .   | .  | .   | .   |
| <i>Filago pyramidata</i> L.                                      | 9    | 18 | 20   | .  | .   | .  | 50  | 33  | 10   | 20 | .   | .  | .   | 33 | .   | .  | .   | .   |
| <i>Filago tyrrhenica</i> Chrtek & Holub ex<br>Soldano & F. Conti | 27   | .  | .    | .  | .   | .  | .   | .   | .    | .  | 17  | .  | .   | .  | .   | .  | .   | .   |
| <i>Frankenia laevis</i> L. subsp. <i>laevis</i>                  | 36   | 27 | .    | .  | .   | 17 | .   | .   | .    | .  | .   | .  | .   | .  | .   | .  | .   | .   |
| <i>Fumaria capreolata</i> L. subsp. <i>capreolata</i>            | 64   | .  | 20   | .  | .   | .  | 67  | .   | 100  | 10 | 100 | .  | 100 | .  | 100 | 33 | 100 | 50  |
| <i>Galactites elegans</i> (All.) Soldano                         | 45   | 9  | 70   | 20 | 67  | 17 | 100 | 33  | 100  | 50 | 50  | .  | 67  | .  | 33  | .  | 100 | 100 |
| <i>Galium aparine</i> L.                                         | .    | .  | .    | 10 | .   | .  | .   | .   | 60   | .  | 50  | .  | 100 | .  | 67  | .  | 100 | .   |
| <i>Galium murale</i> (L.) All.                                   | 9    | 9  | 10   | 10 | .   | .  | .   | 17  | .    | .  | 17  | .  | 33  | .  | .   | .  | .   | .   |
| <i>Galium verrucosum</i> Huds. s.l.                              | 82   | .  | 20   | .  | .   | .  | 83  | .   | 50   | .  | 83  | .  | .   | .  | .   | .  | 50  | .   |
| <i>Gastroidium ventricosum</i> (Gouan) Schinz &<br>Thell.        | 45   | 18 | 80   | 40 | 33  | .  | 100 | 100 | 90   | 90 | 67  | 33 | .   | 67 | .   | .  | 50  | .   |

[illegible]



[illegible]

| Vegetation unit<br>Number of plots                          | COA<br>[11] |    | GRA<br>[10] |    | TWG<br>[6] |    | CIS<br>[6] |    | EUP<br>[10] |    | JUN<br>[6] |    | PIN<br>[3] |    | QUE<br>[3] |    | OLI<br>[2] |    |
|-------------------------------------------------------------|-------------|----|-------------|----|------------|----|------------|----|-------------|----|------------|----|------------|----|------------|----|------------|----|
|                                                             | VE          | SB | VE          | SB | VE         | SB | VE         | SB | VE          | SB | VE         | SB | VE         | SB | VE         | SB | VE         | SB |
|                                                             |             |    |             |    |            |    |            |    |             |    |            |    |            |    |            |    |            |    |
| <i>Leucojum roseum</i> F. Martin                            | .           | 9  | .           | .  | .          | .  | .          | .  | .           | .  | .          | .  | .          | .  | .          | .  | .          | .  |
| <i>Limonium acutifolium</i> (Rchb.) Salmon                  | 36          | 9  | .           | .  | .          | .  | .          | .  | .           | .  | 17         | .  | .          | .  | .          | .  | .          | .  |
| <i>Linaria pelisseriana</i> (L.) Mill.                      | 18          | 18 | 20          | 10 | .          | .  | 100        | 83 | 20          | 50 | 17         | 17 | .          | 33 | .          | .  | .          | .  |
| <i>Linum bienne</i> Mill.                                   | .           | .  | .           | .  | 50         | 33 | .          | .  | 10          | .  | .          | .  | .          | .  | .          | .  | .          | .  |
| <i>Linum strictum</i> L. s.l.                               | 36          | 18 | .           | .  | .          | 17 | 17         | 83 | 10          | 20 | 50         | 17 | .          | .  | .          | .  | .          | .  |
| <i>Linum trigynum</i> L.                                    | 36          | .  | 10          | .  | .          | .  | 83         | .  | 30          | .  | 17         | .  | .          | .  | .          | .  | .          | .  |
| <i>Lobularia maritima</i> (L.) Desv. subsp. <i>maritima</i> | 73          | .  | 20          | 20 | .          | .  | 50         | 17 | 50          | 20 | 33         | .  | .          | .  | .          | .  | 50         | 50 |
| <i>Lolium perenne</i> L.                                    | 64          | .  | 40          | .  | 67         | 17 | 33         | .  | 20          | .  | 50         | .  | .          | .  | .          | .  | 50         | .  |
| <i>Lolium rigidum</i> Gaudin s.l.                           | 73          | 18 | 70          | 50 | 83         | 50 | 33         | .  | 20          | .  | 83         | .  | .          | .  | .          | .  | .          | .  |
| <i>Lotus angustissimus</i> L.                               | .           | .  | .           | .  | 67         | 83 | 17         | 17 | 30          | 10 | 17         | .  | 33         | .  | .          | .  | .          | 50 |
| <i>Lotus corniculatus</i> L. subsp. <i>corniculatus</i>     | 9           | .  | .           | .  | .          | .  | .          | .  | .           | .  | .          | .  | .          | .  | .          | .  | .          | .  |
| <i>Lotus cytisoides</i> L. s.l.                             | 91          | 27 | 10          | .  | 17         | .  | .          | .  | .           | .  | 50         | .  | .          | .  | .          | .  | .          | .  |
| <i>Lotus edulis</i> L.                                      | 82          | 18 | 30          | 10 | 33         | .  | 100        | 17 | 60          | .  | 50         | .  | .          | .  | .          | .  | 50         | .  |
| <i>Lotus ornithopodioides</i> L.                            | 9           | .  | 50          | .  | .          | .  | 33         | .  | 60          | 10 | 17         | .  | 33         | 33 | .          | .  | .          | .  |
| <i>Lotus parviflorus</i> Desf.                              | .           | .  | .           | .  | .          | .  | 50         | .  | 10          | .  | .          | .  | .          | .  | .          | .  | .          | 50 |
| <i>Lupinus gussoneanus</i> Agardh                           | .           | .  | .           | .  | .          | .  | 17         | .  | .           | .  | .          | .  | 33         | .  | .          | .  | .          | .  |
| <i>Lythrum hyssopifolia</i> L.                              | .           | 9  | .           | 20 | 50         | 67 | .          | .  | .           | 10 | 17         | .  | .          | .  | .          | .  | .          | .  |
| <i>Magydaris pastinacea</i> (Lam.) Paol.                    | .           | .  | .           | .  | .          | .  | .          | .  | .           | .  | .          | .  | .          | .  | .          | .  | 50         | .  |
| <i>Malva parviflora</i> L.                                  | .           | .  | 20          | .  | 17         | .  | .          | .  | 20          | .  | 17         | .  | 33         | .  | .          | .  | .          | .  |
| <i>Matthiola tricuspidata</i> (L.) R. Br.                   | 9           | .  | .           | .  | .          | .  | .          | .  | .           | .  | 33         | .  | .          | .  | .          | .  | .          | .  |
| <i>Medicago arabica</i> (L.) Huds.                          | .           | .  | .           | .  | 17         | .  | 17         | .  | 30          | .  | .          | .  | .          | .  | .          | .  | .          | .  |
| <i>Medicago intertexta</i> (L.) Mill.                       | .           | .  | 10          | .  | .          | .  | .          | .  | .           | .  | .          | .  | .          | .  | .          | .  | .          | .  |
| <i>Medicago littoralis</i> Loisel.                          | 9           | .  | .           | .  | .          | .  | 17         | .  | .           | .  | 17         | .  | .          | .  | .          | .  | .          | .  |

| Vegetation unit<br>Number of plots                                      | COA  |    | GRA  |    | TWG |    | CIS |    | EUP  |    | JUN |    | PIN |    | QUE |    | OLI |    |
|-------------------------------------------------------------------------|------|----|------|----|-----|----|-----|----|------|----|-----|----|-----|----|-----|----|-----|----|
|                                                                         | [11] |    | [10] |    | [6] |    | [6] |    | [10] |    | [6] |    | [3] |    | [3] |    | [2] |    |
|                                                                         | VE   | SB | VE   | SB | VE  | SB | VE  | SB | VE   | SB | VE  | SB | VE  | SB | VE  | SB | VE  | SB |
| <i>Medicago minima</i> (L.) L.                                          | 9    | .  | .    | .  | .   | .  | 17  | .  | .    | .  | .   | .  | .   | .  | .   | .  | 50  | .  |
| <i>Medicago murex</i> Willd.                                            | 18   | 9  | 10   | .  | 67  | 17 | 33  | .  | 40   | .  | 33  | .  | .   | .  | .   | .  | .   | .  |
| <i>Medicago orbicularis</i> (L.) Bartal.                                | .    | .  | 10   | .  | .   | .  | .   | .  | 10   | .  | .   | .  | .   | .  | .   | .  | .   | .  |
| <i>Medicago polymorpha</i> L.                                           | 9    | .  | 80   | 10 | 83  | .  | 33  | .  | 60   | .  | 33  | .  | 33  | .  | .   | .  | .   | .  |
| <i>Medicago rugosa</i> Desr.                                            | .    | .  | 30   | .  | .   | .  | .   | .  | .    | .  | .   | .  | .   | .  | .   | .  | .   | .  |
| <i>Medicago truncatula</i> Gaertn.                                      | 18   | .  | 50   | 30 | 17  | .  | 17  | .  | 40   | .  | 67  | .  | .   | .  | .   | .  | 50  | .  |
| <i>Melica ciliata</i> L. subsp. <i>ciliata</i>                          | .    | .  | .    | .  | .   | .  | .   | .  | 30   | .  | .   | .  | .   | .  | .   | .  | 50  | .  |
| <i>Melica ciliata</i> L. subsp. <i>magnolii</i> (Gren. & Godr.) Husn.   | .    | .  | .    | .  | .   | .  | 17  | .  | .    | .  | .   | .  | .   | .  | .   | .  | .   | .  |
| <i>Melica minuta</i> L.                                                 | .    | .  | .    | .  | .   | .  | .   | .  | .    | .  | .   | .  | .   | .  | 33  | .  | .   | .  |
| <i>Melilotus siculus</i> (Turra) Steud.                                 | .    | .  | .    | .  | 33  | 33 | .   | .  | .    | .  | .   | .  | .   | .  | .   | .  | .   | .  |
| <i>Melilotus sulcatus</i> Desf.                                         | .    | .  | 10   | 10 | 17  | 17 | .   | .  | .    | .  | 17  | .  | .   | .  | .   | .  | .   | .  |
| <i>Mentha pulegium</i> L. subsp. <i>pulegium</i>                        | .    | .  | .    | .  | 33  | 33 | .   | .  | .    | .  | .   | .  | .   | .  | .   | .  | .   | .  |
| <i>Mercurialis annua</i> L.                                             | .    | .  | .    | .  | .   | .  | .   | .  | 70   | 20 | 17  | .  | .   | .  | .   | .  | .   | .  |
| <i>Misopates orontium</i> (L.) Raf. subsp. <i>orontium</i>              | .    | 9  | .    | .  | .   | .  | 83  | 50 | 60   | 70 | .   | 17 | 67  | .  | .   | .  | 50  | 50 |
| <i>Montia fontana</i> L. s.l.                                           | .    | .  | .    | .  | 17  | 33 | .   | .  | .    | .  | .   | .  | .   | .  | .   | .  | .   | .  |
| <i>Muscari comosum</i> (L.) Mill.                                       | 9    | .  | 10   | .  | .   | .  | 17  | .  | .    | .  | .   | .  | 67  | .  | .   | .  | .   | .  |
| <i>Myosotis ramosissima</i> Rochel ex Schult. subsp. <i>ramosissima</i> | .    | .  | .    | .  | 17  | .  | .   | .  | .    | .  | .   | .  | .   | .  | 33  | .  | .   | .  |
| <i>Oenanthe crocata</i> L.                                              | .    | .  | .    | .  | .   | .  | .   | .  | .    | .  | .   | .  | .   | .  | 33  | .  | .   | .  |
| <i>Olea europaea</i> L. var. <i>europaea</i>                            | .    | .  | .    | .  | .   | .  | .   | .  | 50   | .  | 33  | .  | 100 | .  | 33  | .  | 100 | .  |
| <i>Olea europaea</i> L. var. <i>sylvestris</i> Brot.                    | 9    | .  | .    | .  | .   | .  | 33  | .  | 20   | .  | .   | .  | .   | .  | .   | .  | .   | .  |
| <i>Ononis reclinata</i> L.                                              | 18   | 9  | .    | .  | .   | .  | 83  | .  | 30   | .  | 33  | .  | .   | .  | .   | .  | .   | .  |

[illegible]

| Vegetation unit<br>Number of plots                                                            | COA  |    | GRA  |     | TWG |    | CIS |    | EUP  |    | JUN |    | PIN |    | QUE |    | OLI |    |
|-----------------------------------------------------------------------------------------------|------|----|------|-----|-----|----|-----|----|------|----|-----|----|-----|----|-----|----|-----|----|
|                                                                                               | [11] |    | [10] |     | [6] |    | [6] |    | [10] |    | [6] |    | [3] |    | [3] |    | [2] |    |
|                                                                                               | VE   | SB | VE   | SB  | VE  | SB | VE  | SB | VE   | SB | VE  | SB | VE  | SB | VE  | SB | VE  | SB |
| <i>Phedimus stellatus</i> (L.) Raf.                                                           | .    | .  | .    | .   | .   | .  | .   | .  | 20   | 10 | .   | .  | 33  | .  | .   | .  | .   | .  |
| <i>Pinus pinea</i> L.                                                                         | .    | .  | .    | .   | .   | .  | .   | .  | .    | .  | .   | .  | 100 | .  | .   | .  | .   | .  |
| <i>Piptatherum miliaceum</i> (L.) Coss. s.l.                                                  | 9    | .  | .    | .   | .   | .  | .   | .  | 50   | 20 | 50  | 17 | 33  | 33 | .   | .  | .   | .  |
| <i>Pistacia lentiscus</i> L.                                                                  | 45   | .  | 10   | .   | .   | .  | 67  | .  | 90   | .  | 100 | .  | 100 | .  | .   | .  | 100 | .  |
| <i>Pisum sativum</i> L. s.l.                                                                  | .    | .  | .    | .   | .   | .  | .   | .  | 10   | .  | .   | .  | .   | .  | .   | .  | 50  | .  |
| <i>Plantago afra</i> L. s.l.                                                                  | .    | .  | .    | .   | .   | .  | .   | .  | .    | .  | 17  | .  | .   | .  | .   | .  | .   | .  |
| <i>Plantago bellardii</i> All.                                                                | 9    | .  | .    | .   | .   | .  | 67  | .  | 20   | 10 | .   | .  | .   | .  | .   | .  | .   | .  |
| <i>Plantago coronopus</i> L. subsp. <i>coronopus</i>                                          | 73   | 73 | 50   | 40  | 83  | 17 | .   | .  | .    | .  | 33  | 33 | .   | .  | .   | .  | .   | .  |
| <i>Plantago lagopus</i> L.                                                                    | 9    | .  | 100  | 60  | 67  | 33 | 17  | .  | 30   | 20 | 17  | .  | .   | .  | .   | .  | .   | .  |
| <i>Plantago lanceolata</i> L.                                                                 | 36   | .  | 10   | 40  | 33  | .  | 17  | .  | 10   | .  | .   | .  | 33  | .  | .   | .  | .   | .  |
| <i>Poa annua</i> L.                                                                           | 9    | .  | 70   | 100 | 33  | 50 | .   | 33 | 10   | .  | .   | 17 | .   | 33 | .   | .  | .   | .  |
| <i>Poa trivialis</i> L.                                                                       | .    | .  | .    | 20  | 33  | .  | .   | .  | .    | .  | .   | .  | .   | .  | 100 | .  | .   | .  |
| <i>Polycarpon tetraphyllum</i> (L.) L. s.l.                                                   | 45   | 64 | 90   | 100 | .   | 17 | 50  | 50 | 50   | 70 | 67  | 50 | 67  | 33 | .   | .  | 50  | 50 |
| <i>Polypodium cambricum</i> L.                                                                | .    | .  | .    | .   | .   | .  | .   | .  | .    | .  | .   | .  | 33  | .  | 67  | .  | .   | .  |
| <i>Polypogon maritimus</i> Willd.                                                             | 45   | 45 | .    | .   | 17  | 50 | .   | 17 | .    | .  | 17  | 17 | .   | .  | .   | .  | .   | 50 |
| <i>Polypogon monspeliensis</i> (L.) Desf.                                                     | .    | .  | .    | .   | 33  | 17 | .   | .  | .    | .  | .   | .  | .   | .  | .   | .  | .   | .  |
| <i>Polypogon viridis</i> (Gouan) Breistr.                                                     | 9    | .  | .    | .   | .   | .  | .   | .  | .    | .  | .   | .  | .   | .  | .   | .  | .   | .  |
| <i>Prasium majus</i> L.                                                                       | 36   | .  | .    | .   | .   | .  | 67  | .  | 90   | .  | 67  | .  | 33  | .  | .   | .  | 50  | .  |
| <i>Prospero obtusifolia</i> (Poir.) Speta subsp. <i>intermedia</i> (Guss.) Soldano & F. Conti | 9    | .  | .    | .   | .   | .  | .   | .  | .    | .  | .   | .  | .   | .  | .   | .  | .   | .  |
| <i>Pulicaria odora</i> (L.) Rchb.                                                             | .    | .  | 10   | .   | .   | .  | 17  | .  | .    | .  | .   | .  | .   | .  | .   | .  | .   | .  |
| <i>Quercus ilex</i> L. subsp. <i>ilex</i>                                                     | .    | .  | .    | .   | .   | .  | .   | .  | .    | .  | .   | .  | 100 | .  | 100 | .  | .   | .  |
| <i>Ranunculus cordiger</i> Viv. subsp. <i>cordiger</i>                                        | .    | .  | .    | .   | 17  | .  | .   | .  | .    | .  | .   | .  | .   | .  | .   | .  | .   | .  |
| <i>Ranunculus muricatus</i> L.                                                                | .    | .  | 40   | .   | 100 | 67 | 17  | .  | 10   | 10 | .   | .  | .   | .  | .   | .  | .   | .  |

| Vegetation unit<br>Number of plots                            | COA  |    | GRA  |     | TWG |    | CIS |    | EUP  |    | JUN |    | PIN |    | QUE |     | OLI |    |
|---------------------------------------------------------------|------|----|------|-----|-----|----|-----|----|------|----|-----|----|-----|----|-----|-----|-----|----|
|                                                               | [11] |    | [10] |     | [6] |    | [6] |    | [10] |    | [6] |    | [3] |    | [3] |     | [2] |    |
|                                                               | VE   | SB | VE   | SB  | VE  | SB | VE  | SB | VE   | SB | VE  | SB | VE  | SB | VE  | SB  | VE  | SB |
| <i>Ranunculus parviflorus</i> L.                              | .    | .  | .    | .   | .   | .  | .   | .  | .    | 10 | .   | .  | .   | .  | 33  | .   | .   | .  |
| <i>Ranunculus sardous</i> Crantz s.l.                         | .    | .  | .    | .   | 67  | 17 | .   | .  | .    | .  | .   | .  | .   | .  | .   | .   | .   | .  |
| <i>Raphanus raphanistrum</i> L. s.l.                          | .    | .  | 70   | 30  | 50  | 17 | 17  | .  | 30   | 30 | .   | .  | .   | .  | .   | .   | .   | .  |
| <i>Reichardia picroides</i> (L.) Roth                         | 82   | .  | 20   | .   | .   | .  | 50  | .  | 10   | .  | 17  | .  | .   | .  | .   | .   | .   | .  |
| <i>Rhagadiolus stellatus</i> (L.) Gaertn.                     | .    | .  | .    | .   | .   | .  | .   | .  | .    | .  | 17  | .  | .   | .  | 33  | 33  | .   | .  |
| <i>Romulea requienii</i> Parl.                                | 18   | 27 | .    | 10  | 50  | .  | 17  | .  | .    | .  | .   | .  | .   | .  | .   | .   | .   | .  |
| <i>Rostraria cristata</i> (L.) Tzvelev s.l.                   | 9    | 9  | 60   | 100 | 17  | .  | .   | 17 | 30   | 40 | .   | .  | .   | .  | .   | .   | .   | .  |
| <i>Rostraria litorea</i> (All.) Holub                         | 55   | 27 | 20   | 40  | .   | .  | 33  | .  | 20   | .  | 33  | 17 | .   | .  | .   | .   | .   | .  |
| <i>Rubia peregrina</i> L. s.l.                                | .    | .  | .    | .   | .   | .  | .   | .  | 40   | .  | 33  | .  | 67  | .  | .   | .   | .   | .  |
| <i>Rubus ulmifolius</i> Schott                                | 9    | .  | .    | .   | .   | .  | .   | .  | 10   | .  | .   | .  | 100 | .  | 67  | .   | .   | .  |
| <i>Rumex bucephalophorus</i> L. subsp. <i>bucephalophorus</i> | 91   | 45 | 30   | .   | 17  | .  | 50  | .  | 20   | 10 | 50  | 50 | .   | .  | .   | .   | .   | .  |
| <i>Rumex conglomeratus</i> Murray                             | .    | .  | 30   | .   | 33  | .  | .   | .  | 10   | .  | .   | .  | .   | .  | .   | .   | .   | .  |
| <i>Rumex crispus</i> L.                                       | .    | .  | .    | .   | .   | .  | .   | .  | .    | .  | 17  | .  | .   | .  | .   | .   | .   | .  |
| <i>Rumex pulcher</i> L. subsp. <i>pulcher</i>                 | .    | .  | 30   | 10  | 50  | 33 | .   | .  | .    | .  | .   | .  | .   | .  | .   | .   | .   | .  |
| <i>Ruta chalepensis</i> L.                                    | .    | .  | .    | .   | .   | .  | 33  | .  | 40   | 10 | 67  | 33 | .   | .  | .   | .   | .   | .  |
| <i>Sagina apetala</i> Ard. subsp. <i>apetala</i>              | 9    | .  | .    | .   | .   | .  | .   | .  | .    | .  | .   | .  | .   | .  | .   | .   | .   | .  |
| <i>Sagina maritima</i> G. Don                                 | 27   | 55 | 10   | 40  | .   | 33 | .   | .  | .    | .  | .   | 17 | .   | .  | .   | .   | .   | .  |
| <i>Salvia verbenaca</i> L.                                    | .    | .  | 30   | 10  | .   | .  | .   | .  | .    | .  | .   | .  | .   | .  | .   | .   | .   | .  |
| <i>Sanguisorba minor</i> Scop. s.l.                           | 9    | .  | .    | .   | .   | .  | .   | .  | .    | .  | .   | .  | .   | .  | .   | .   | .   | .  |
| <i>Scandix pecten-veneris</i> L. s.l.                         | 9    | .  | .    | .   | .   | .  | .   | .  | .    | .  | .   | .  | .   | .  | .   | .   | .   | .  |
| <i>Schoenus nigricans</i> L.                                  | 9    | .  | .    | .   | .   | .  | .   | .  | .    | .  | .   | .  | .   | .  | .   | .   | .   | .  |
| <i>Scorpiurus muricatus</i> L.                                | 27   | 9  | 30   | .   | 17  | .  | 100 | 17 | 20   | .  | .   | .  | .   | .  | .   | .   | .   | .  |
| <i>Scrophularia peregrina</i> L.                              | .    | .  | .    | .   | .   | .  | .   | .  | 30   | 20 | .   | .  | 33  | .  | 33  | 100 | 100 | .  |

| Vegetation unit<br>Number of plots                                      | COA  |    | GRA  |     | TWG |    | CIS |     | EUP  |    | JUN |    | PIN |    | QUE |     | OLI |    |
|-------------------------------------------------------------------------|------|----|------|-----|-----|----|-----|-----|------|----|-----|----|-----|----|-----|-----|-----|----|
|                                                                         | [11] |    | [10] |     | [6] |    | [6] |     | [10] |    | [6] |    | [3] |    | [3] |     | [2] |    |
|                                                                         | VE   | SB | VE   | SB  | VE  | SB | VE  | SB  | VE   | SB | VE  | SB | VE  | SB | VE  | SB  | VE  | SB |
| <i>Scrophularia trifoliata</i> L.                                       | .    | .  | .    | .   | .   | .  | .   | .   | .    | .  | .   | .  | .   | .  | .   | .   | .   | 50 |
| <i>Sedum litoreum</i> Guss.                                             | .    | .  | .    | .   | .   | .  | .   | .   | 10   | 10 | .   | .  | .   | .  | .   | .   | .   | .  |
| <i>Sedum rubens</i> L.                                                  | 36   | 18 | .    | .   | .   | .  | .   | .   | 30   | 20 | 50  | 33 | .   | .  | .   | .   | .   | .  |
| <i>Selaginella denticulata</i> (L.) Spring                              | 9    | 9  | .    | .   | .   | .  | 17  | .   | .    | 30 | 17  | 17 | 67  | 67 | 100 | 100 | .   | 50 |
| <i>Senecio leucanthemifolius</i> Poir. subsp. <i>leucanthemifolius</i>  | 91   | 36 | 10   | 10  | .   | .  | 17  | 17  | 20   | 20 | 83  | 17 | .   | .  | 33  | .   | .   | .  |
| <i>Senecio lividus</i> L.                                               | 27   | .  | .    | .   | .   | .  | 50  | .   | 90   | 20 | 50  | .  | 100 | .  | 67  | .   | 50  | .  |
| <i>Senecio vulgaris</i> L.                                              | 9    | .  | 50   | 20  | .   | .  | .   | .   | 20   | 30 | 17  | 17 | .   | .  | .   | .   | .   | .  |
| <i>Sherardia arvensis</i> L.                                            | 27   | 9  | 100  | 80  | 50  | 33 | 100 | 83  | 90   | 20 | 67  | .  | .   | .  | .   | .   | 50  | 50 |
| <i>Sideritis romana</i> L. subsp. <i>romana</i>                         | 9    | .  | 10   | .   | .   | .  | .   | .   | 40   | .  | 17  | .  | .   | .  | .   | .   | 50  | .  |
| <i>Silene coelirosa</i> (L.) Godr.                                      | .    | .  | .    | .   | .   | .  | .   | .   | .    | .  | 17  | .  | .   | .  | .   | .   | .   | .  |
| <i>Silene gallica</i> L.                                                | 100  | 82 | 100  | 100 | 100 | 50 | 100 | 100 | 100  | 90 | 67  | 67 | .   | 33 | .   | 33  | 50  | 50 |
| <i>Silene laeta</i> (Aiton) Godr.                                       | 9    | .  | .    | .   | 67  | 67 | 17  | .   | .    | .  | .   | .  | .   | .  | .   | .   | .   | .  |
| <b><i>Silene nocturna</i> L.</b>                                        | .    | .  | .    | .   | .   | .  | .   | .   | .    | .  | .   | 17 | .   | .  | .   | .   | .   | .  |
| <i>Silene sericea</i> All.                                              | 64   | .  | .    | .   | .   | .  | .   | .   | .    | .  | 33  | .  | .   | .  | .   | .   | .   | .  |
| <i>Silene vulgaris</i> (Moench) Garcke s.l.                             | .    | .  | 10   | .   | .   | .  | .   | .   | .    | .  | .   | .  | .   | .  | .   | .   | .   | .  |
| <i>Sisymbrium officinale</i> (L.) Scop.                                 | .    | .  | 10   | 10  | .   | .  | .   | .   | 20   | .  | 17  | .  | 33  | .  | 33  | 33  | 50  | .  |
| <i>Smilax aspera</i> L.                                                 | 9    | .  | .    | .   | .   | .  | .   | .   | .    | .  | .   | .  | .   | .  | .   | .   | .   | .  |
| <i>Solanum nigrum</i> L.                                                | .    | .  | .    | .   | .   | .  | 17  | .   | 60   | .  | 17  | .  | 33  | .  | .   | .   | 100 | .  |
| <i>Sonchus arvensis</i> L. s.l.                                         | 36   | .  | 20   | .   | 17  | .  | 67  | .   | 30   | .  | 50  | .  | 33  | .  | .   | .   | 50  | .  |
| <i>Sonchus asper</i> (L.) Hill s.l.                                     | .    | .  | 10   | .   | 17  | 17 | .   | .   | 20   | .  | .   | .  | .   | .  | .   | .   | .   | .  |
| <i>Sonchus bulbosus</i> (L.) N. Kilian & Greuter subsp. <i>bulbosus</i> | 64   | .  | .    | .   | 17  | .  | 83  | .   | 30   | .  | 83  | .  | 33  | .  | .   | .   | .   | .  |
| <i>Sonchus oleraceus</i> L.                                             | 36   | .  | 20   | 10  | 33  | .  | 83  | .   | 100  | 10 | 83  | .  | 67  | .  | .   | .   | 50  | 50 |

| Vegetation unit<br>Number of plots                               | COA<br>[11] |    | GRA<br>[10] |    | TWG<br>[6] |    | CIS<br>[6] |    | EUP<br>[10] |    | JUN<br>[6] |    | PIN<br>[3] |     | QUE<br>[3] |     | OLI<br>[2] |     |
|------------------------------------------------------------------|-------------|----|-------------|----|------------|----|------------|----|-------------|----|------------|----|------------|-----|------------|-----|------------|-----|
|                                                                  | VE          | SB | VE          | SB | VE         | SB | VE         | SB | VE          | SB | VE         | SB | VE         | SB  | VE         | SB  | VE         | SB  |
|                                                                  |             |    |             |    |            |    |            |    |             |    |            |    |            |     |            |     |            |     |
| <i>Sonchus tenerrimus</i> L.                                     | .           | .  | 10          | .  | .          | .  | .          | .  | 10          | .  | .          | .  | .          | .   | .          | .   | .          | .   |
| <i>Spergula arvensis</i> L.                                      | .           | .  | .           | 20 | 17         | 50 | .          | 17 | .           | 20 | .          | .  | .          | .   | .          | .   | .          | .   |
| <i>Spergularia rubra</i> (L.) J. & C. Presl                      | .           | 9  | .           | 30 | .          | 50 | .          | .  | .           | 10 | .          | 17 | .          | .   | .          | .   | .          | .   |
| <i>Spergularia salina</i> J. & C. Presl                          | 9           | 9  | 20          | .  | 33         | 17 | .          | .  | .           | .  | 17         | .  | .          | .   | .          | .   | .          | .   |
| <i>Sporobolus virginicus</i> Kunth                               | 27          | .  | .           | .  | 33         | .  | .          | .  | .           | .  | .          | .  | .          | .   | .          | .   | .          | .   |
| <i>Stachys arvensis</i> (L.) L.                                  | 18          | 9  | 10          | 10 | 17         | .  | 100        | 17 | 80          | 80 | 17         | .  | 100        | 33  | 33         | 33  | 50         | .   |
| <i>Stellaria media</i> (L.) Vill. s.l.                           | 27          | 27 | 50          | 80 | .          | 50 | 33         | 50 | 80          | 80 | 67         | 33 | 33         | 100 | 100        | 100 | 100        | 100 |
| <i>Stipa capensis</i> Thunb.                                     | .           | .  | 10          | 20 | .          | .  | .          | 17 | 20          | 10 | .          | .  | .          | .   | .          | .   | .          | .   |
| <i>Tamus communis</i> L.                                         | .           | .  | .           | .  | .          | .  | .          | .  | 30          | .  | .          | .  | 100        | .   | 100        | .   | 100        | .   |
| <i>Teucrium marum</i> L.                                         | 9           | .  | .           | .  | .          | .  | .          | .  | .           | .  | 17         | .  | .          | .   | .          | .   | .          | .   |
| <i>Teucrium massiliense</i> L.                                   | .           | .  | .           | .  | .          | .  | .          | .  | .           | .  | .          | .  | .          | 33  | .          | .   | .          | .   |
| <i>Theligonum cynocrambe</i> L.                                  | 9           | 9  | .           | .  | .          | .  | 83         | .  | 90          | 20 | 50         | .  | 100        | .   | 67         | .   | 50         | .   |
| <i>Thesium humile</i> Vahl                                       | .           | .  | .           | .  | .          | .  | 17         | .  | .           | .  | .          | .  | .          | .   | .          | .   | .          | .   |
| <i>Thymelaea hirsuta</i> (L.) Endl.                              | 55          | 9  | 20          | .  | .          | .  | 17         | .  | .           | .  | 33         | .  | .          | .   | .          | .   | .          | .   |
| <i>Tillaea muscosa</i> L.                                        | .           | 9  | .           | .  | .          | .  | .          | .  | .           | .  | .          | .  | .          | .   | .          | .   | .          | .   |
| <i>Tolpis umbellata</i> Bertol.                                  | 9           | .  | 20          | 20 | .          | .  | 83         | 67 | 10          | .  | 17         | .  | .          | .   | .          | .   | .          | .   |
| <i>Torilis arvensis</i> (Huds.) Link s.l.                        | .           | .  | .           | .  | .          | .  | 50         | .  | 70          | .  | 33         | .  | 100        | .   | 33         | .   | 100        | .   |
| <i>Torilis nodosa</i> (L.) Gaertn.                               | 45          | .  | 40          | .  | 17         | .  | 50         | .  | 80          | 20 | 50         | 17 | 33         | .   | 33         | .   | 50         | 50  |
| <i>Trachynia distachya</i> (L.) Link                             | 27          | .  | 10          | .  | .          | .  | 83         | 67 | 100         | 50 | 67         | .  | 67         | .   | .          | .   | 100        | 50  |
| <i>Trifolium angustifolium</i> L. subsp.<br><i>angustifolium</i> | 45          | .  | 70          | .  | 83         | .  | 67         | .  | 30          | .  | 17         | .  | .          | 33  | .          | .   | 50         | .   |
| <i>Trifolium arvense</i> L. s.l.                                 | .           | .  | .           | .  | .          | .  | 83         | .  | 50          | 10 | .          | .  | .          | .   | .          | .   | .          | .   |
| <i>Trifolium bocconei</i> Savi                                   | .           | .  | .           | .  | .          | .  | 17         | .  | 10          | .  | .          | .  | .          | .   | .          | .   | .          | .   |
| <i>Trifolium campestre</i> Schreb.                               | 82          | 27 | 70          | 10 | 50         | 50 | 100        | 50 | 100         | 40 | 67         | .  | 33         | 33  | 67         | 33  | 50         | 50  |



[illegible]

| Vegetation unit<br>Number of plots                     | COA  |    | GRA  |    | TWG |    | CIS |    | EUP  |    | JUN |    | PIN |    | QUE |    | OLI |    |
|--------------------------------------------------------|------|----|------|----|-----|----|-----|----|------|----|-----|----|-----|----|-----|----|-----|----|
|                                                        | [11] |    | [10] |    | [6] |    | [6] |    | [10] |    | [6] |    | [3] |    | [3] |    | [2] |    |
|                                                        | VE   | SB | VE   | SB | VE  | SB | VE  | SB | VE   | SB | VE  | SB | VE  | SB | VE  | SB | VE  | SB |
| <i>Urospermum picroides</i> (L.) Scop. ex F.W. Schmidt | 18   | .  | .    | .  | .   | .  | 67  | .  | 100  | 10 | 50  | .  | 67  | .  | .   | .  | 50  | .  |
| <i>Urtica membranacea</i> Poir. ex Savigny             | .    | .  | .    | .  | .   | .  | .   | .  | .    | .  | 17  | 17 | .   | .  | 33  | 33 | 50  | .  |
| <i>Urtica pilulifera</i> L.                            | .    | .  | .    | .  | .   | .  | .   | .  | .    | .  | .   | .  | .   | .  | 33  | .  | .   | .  |
| <i>Valantia muralis</i> L.                             | 64   | .  | .    | .  | .   | .  | .   | .  | .    | .  | 83  | .  | .   | .  | .   | .  | .   | .  |
| <b><i>Valerianella locusta</i> (L.) Laterr.</b>        | .    | 18 | .    | .  | .   | .  | .   | 17 | .    | .  | .   | 17 | .   | .  | .   | .  | .   | .  |
| <i>Valerianella microcarpa</i> Loisel.                 | 18   | .  | .    | .  | .   | .  | 33  | .  | .    | .  | .   | .  | .   | .  | .   | .  | .   | .  |
| <i>Veronica cymbalaria</i> Bodard s.l.                 | .    | .  | .    | .  | .   | .  | .   | .  | .    | .  | .   | .  | 33  | .  | 67  | .  | 50  | .  |
| <i>Vicia benghalensis</i> L.                           | .    | .  | .    | .  | .   | .  | 33  | .  | 20   | .  | .   | .  | .   | .  | .   | .  | .   | .  |
| <i>Vicia disperma</i> DC.                              | .    | .  | .    | .  | .   | .  | 17  | .  | .    | .  | .   | .  | 33  | .  | 33  | .  | .   | .  |
| <i>Vicia hybrida</i> L.                                | 9    | .  | .    | .  | .   | .  | .   | .  | 30   | .  | .   | .  | .   | .  | .   | .  | .   | .  |
| <i>Vicia lathyroides</i> L.                            | .    | 9  | .    | .  | .   | .  | .   | .  | .    | .  | .   | .  | .   | .  | .   | .  | .   | .  |
| <i>Vicia parviflora</i> Cav.                           | .    | .  | .    | .  | .   | .  | .   | .  | .    | .  | .   | .  | 67  | .  | .   | .  | .   | .  |
| <i>Vicia sativa</i> L. subsp. <i>nigra</i> (L.) Ehrh.  | 27   | .  | 20   | .  | 17  | .  | 100 | .  | 90   | .  | 50  | .  | 67  | .  | 33  | .  | .   | .  |
| <i>Vicia tetrasperma</i> (L.) Schreb.                  | .    | .  | .    | .  | .   | .  | .   | .  | 30   | .  | .   | .  | 67  | .  | .   | .  | .   | .  |
| <i>Vicia villosa</i> Roth s.l.                         | .    | .  | .    | .  | .   | .  | .   | .  | 10   | .  | .   | .  | .   | .  | .   | .  | .   | .  |
| <i>Vulpia ligustica</i> (All.) Link                    | .    | .  | 40   | 50 | 50  | 50 | 17  | .  | 10   | .  | .   | .  | .   | .  | .   | .  | .   | .  |
| <i>Vulpia myuros</i> (L.) C.C. Gmel.                   | 18   | 9  | 50   | 40 | 33  | .  | 50  | 50 | 10   | .  | .   | .  | .   | .  | .   | .  | 50  | .  |

## References

- Conti, F.; Abbate, G.; Alessandrini, A.; Blasi, C., Eds. *An annotated checklist of the Italian vascular flora*; Palombi Editori: Rome, Italy, 2005; ISBN 88-7621-458-5.
- Pignatti, S. *Flora d'Italia*; Edagricole: Bologna, Italy, 1982; ISBN 8820623102.
